# Supplementary material for: Correlations between Molecular Landscape and Sonographic Image of Different Variants of Papillary Thyroid Carcinoma
Source: MDPI journal article supplement (doi:10.3390/jcm8111916), 2019-11-08
Supplement: s1 [file s1]

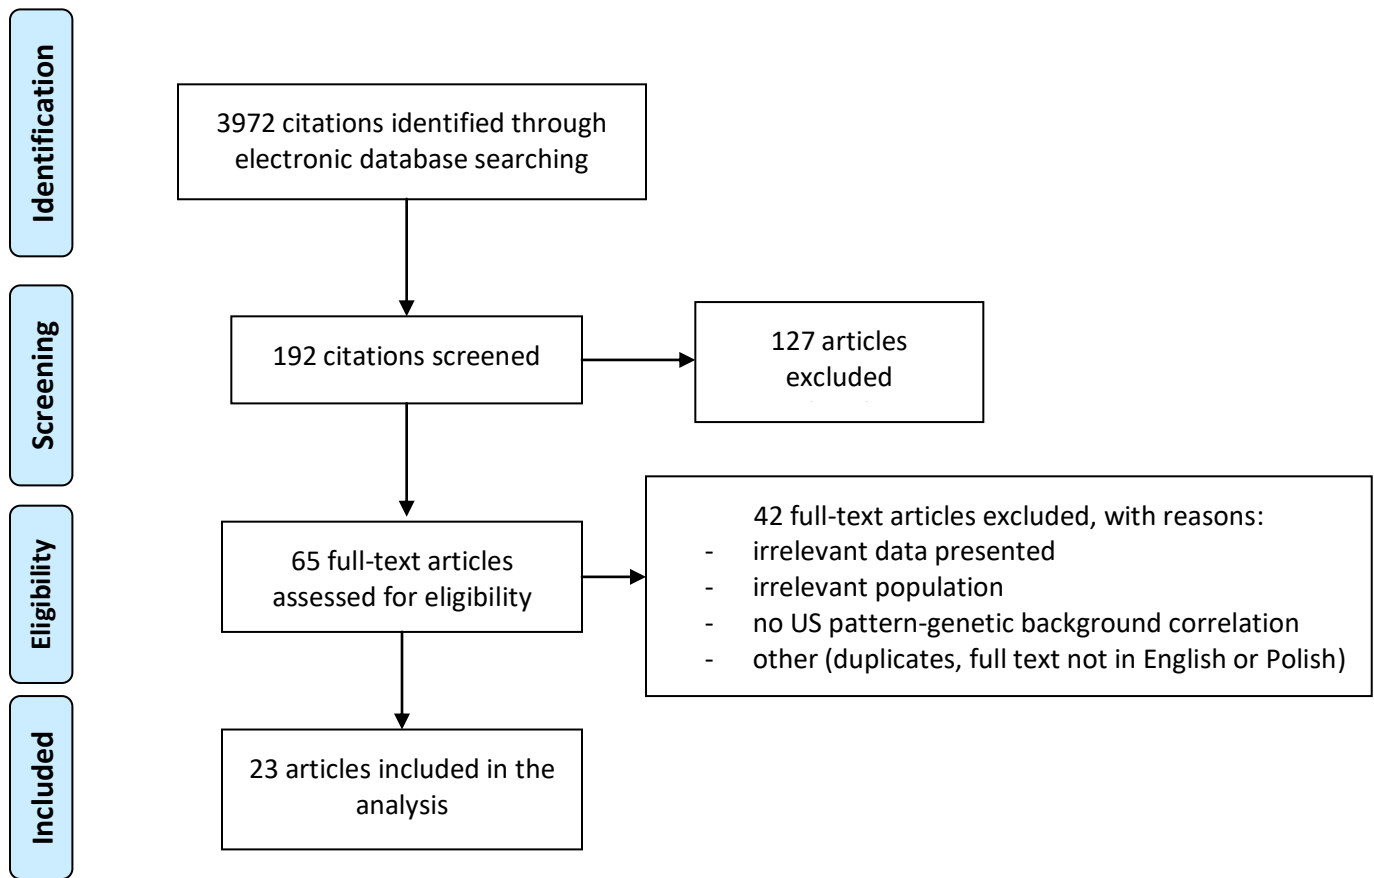

Figure S1. Study selection flowchart outlining the protocol adopted in this review based on the Preferred Reporting Items for Systematic Reviews and Meta-Analyses (PRISMA) Four-Phase Flow Diagram.
